# Supplementary material for: The Household Context of In Situ Conservation in a Center of Crop Diversity: Self-Reported Practices and Perceptions of Maize and Phaseolus Bean Farmers in Oaxaca, Mexico
Source: MDPI journal article supplement (doi:10.3390/su14127148), 2022-06-10
Supplement: s1 [file s1]

**Table S1a. Sierra Juárez Region. Maize and bean varieties farmers reported growing**

| Sierra Juárez, all communities              |                                                                                                |                                                        |                                             |                                             |                                                            |                                                        |                                             |
|---------------------------------------------|------------------------------------------------------------------------------------------------|--------------------------------------------------------|---------------------------------------------|---------------------------------------------|------------------------------------------------------------|--------------------------------------------------------|---------------------------------------------|
| Named maize varieties <sup>1</sup> , n = 19 |                                                                                                |                                                        |                                             | Named bean varieties <sup>1</sup> , n = 17  |                                                            |                                                        |                                             |
| Local name and community where that is used | Spanish translation, equivalent names in other communities                                     | Number of households that reported growing the variety | Proportion of households in regional sample | Local name and community where that is used | Spanish translation, equivalent names in other communities | Number of households that reported growing the variety | Proportion of households in regional sample |
| Yuá bedári idal-lá, Atepec                  | Blanco criollo, tierra fria; Yuk poop in Cacalotepec                                           | 6                                                      | 3.0%                                        | Daá nató, Atepec, Jaltianguis               | Frijol grande                                              | 31                                                     | 15.5%                                       |
| Yuá bedári, Atepec                          | Blanco criollo; Xhuaá tzizi in Jaltianguis; Poop mook in Cacalotepec; Poo'p mook in Totontepec | 125                                                    | 62.5%                                       | Daá yii yi, Atepec, Jaltianguis             | Frijol de basura (Idel ejote)                              | 4                                                      | 2.0%                                        |
| Yuá bedári b'yá, Atepec                     | Blanco bolita                                                                                  | 2                                                      | 1.0%                                        | Daá yela, Atepec, Jaltianguis               | Frijol de milpa; Mokxëjk                                   | 35                                                     | 17.5%                                       |
| Yuá bedári bíini, Atepec                    | Blanco tablita                                                                                 | 1                                                      | 0.5%                                        | Daá cuarentena, Atepec, Jaltianguis         | Daa ya-aa in Jaltianguis; Frijol cuarenteno o de conejo    | 4                                                      | 2.0%                                        |
| Yuá bedári yúbá, Atepec                     | Blanco criollo de tierra caliente                                                              | 3                                                      | 1.5%                                        | Daá güin-nii, Atepec, Jaltianguis           | Frijol delgado                                             | 76                                                     | 38.0%                                       |
| Yuá bedatzi, Atepec                         | Amarillo criollo; Xhuaá yatzi in Jaltianguis; Pu'tsmok in Cacalotepec; Pöts mook in Totontepec | 84                                                     | 42.0%                                       | Daá tupií, Atepec, Jaltianguis              | Frijol que silba; Satope, Daá tupií                        | 19                                                     | 9.5%                                        |
| Yuá bedatsi Zogochu, Atepec                 | Amarillo de Zogochu, color intenso                                                             | 3                                                      | 1.5%                                        | Daá ixhia                                   | Frijol de bejuco o frijol de red                           | 10                                                     | 5.0%                                        |
| Yuá bedahuí, Atepec                         | Maíz pinto; Xhuaá chishi in Jaltianguis; katskutun in Cacalotepec; Katst mook, Totontepec      | 55                                                     | 27.5%                                       | Daá chix-xí, Atepec, Jaltianguis            | Frijol revuelto o mezclado                                 | 6                                                      | 3.0%                                        |
| Apatpoop, Cacalotepec                       | Maíz blanco de tierras baja con granos chicos y aplastaditos                                   | 1                                                      | 0.5%                                        | Daá bel-la tuaa, Atepec, Jaltianguis        | Frijol de gusano de maguey                                 | 9                                                      | 4.5%                                        |
| Mutskkats, Cacalotepec                      | Maíz chiquito pinto que se cosecha en corto tiempo                                             | 1                                                      | 0.5%                                        | Daá yii, Atepec, Jaltianguis                | Frijol de carrizo                                          | 1                                                      | 0.5%                                        |
| Poopkats, Cacalotepec                       | Maíz blanco pinto                                                                              | 2                                                      | 1.0%                                        | Pitxëjk, Cacalotepec                        | Frijol de monte                                            | 30                                                     | 15.0%                                       |
| Poop kutun, Cacalotepec                     | Maíz blanco, cabeza de cerro                                                                   | 1                                                      | 0.5%                                        | Mëkenya'an, Cacalotepec                     | Frijolón                                                   | 17                                                     | 8.5%                                        |

|                                      |                                                             |   |      |                            |                                                                      |    |       |
|--------------------------------------|-------------------------------------------------------------|---|------|----------------------------|----------------------------------------------------------------------|----|-------|
| Yukpu'ts,<br>Cacalotepec             | Maíz amarillo de tierras frías o cerros, granos muy grandes | 1 | 0.5% | Tsapsna'an,<br>Cacalotepec | Ejote rojo de milpa; Bejuco frijol, ejotero, Aats xəjk in Totontepec | 21 | 10.5% |
| Tsapoo'p ,<br>Totontepec             | Blanco, "piedra blanca," zapcot                             | 1 | 0.5% | Tsaa xəjk ,<br>Cacalotepec | Frijol blanco de piedra in Cacalotepec                               | 1  | 0.5%  |
| Yëk mook ,<br>Totontepec             | Negro maíz, con pinto                                       | 1 | 0.5% | Nö'ötk,<br>Totontepec      | Salaya                                                               | 5  | 2.5%  |
| Xhuaá dia ,<br>Jaltianguis           | Maíz negro o morado; Kats mok in Cacalotepec                | 9 | 4.5% | Mējü xəjk,<br>Totontepec   | Grueso, ancho, frijol grande; Daá laá                                | 50 | 25.0% |
| Xhuaá shatoó ,<br>Jaltianguis        | Maíz de monte                                               | 1 | 0.5% | Tigre, Totontepec          | Frijol tigre                                                         | 1  | 0.5%  |
| Xhuaá yatzi suba ,<br>Jaltianguis    | Maíz amarillo claro                                         | 2 | 1.0% |                            |                                                                      |    |       |
| Maíz amarillo de Talea , Jaltianguis | Maíz amarillo de Talea                                      | 1 | 0.5% |                            |                                                                      |    |       |

---

<sup>1</sup> Local name in Zapotec (Atepec, Jaltianguis) , Mixe (Cacalotepec, Totontepec) or Spanish

**Table S1b. Valles Centrales Region. Maize and bean varieties farmers reported growing**

| Named maize varieties <sup>1</sup> , n = 14 |                                                        |                                             | Named bean varieties <sup>1</sup> , n = 13 |                                                        |                                             |
|---------------------------------------------|--------------------------------------------------------|---------------------------------------------|--------------------------------------------|--------------------------------------------------------|---------------------------------------------|
| Name                                        | Number of households that reported growing the variety | Proportion of households in regional sample | Name                                       | Number of households that reported growing the variety | Proportion of households in regional sample |
| Blanco bolita                               | 29                                                     | 14.1%                                       | Delgado                                    | 83                                                     | 40.5%                                       |
| Blanco criollo                              | 162                                                    | 79.0%                                       | Gruesso, Jamapa, Frijol poblano            | 25                                                     | 12.2%                                       |
| Blanco delgado                              | 2                                                      | 1.0%                                        | Bizagu                                     | 22                                                     | 10.7%                                       |
| Amarillo delgado                            | 1                                                      | 8.8%                                        | Colorado                                   | 5                                                      | 2.4%                                        |
| Amarillo                                    | 18                                                     | 0.5%                                        | Piñero                                     | 6                                                      | 2.9%                                        |
| Negrito                                     | 8                                                      | 3.9%                                        | Guishumil                                  | 1                                                      | 0.5%                                        |
| Belatove                                    | 1                                                      | 0.5%                                        | Gordo                                      | 7                                                      | 3.4%                                        |
| Rojo                                        | 2                                                      | 1.0%                                        | Bayo                                       | 2                                                      | 1.0%                                        |
| Pinto                                       | 2                                                      | 1.0%                                        | Serrano                                    | 4                                                      | 2.0%                                        |
| Tepecinte o tepecintle                      | 6                                                      | 2.9%                                        | Blanco                                     | 3                                                      | 1.5%                                        |
| Tabla o tablita                             | 2                                                      | 1.0%                                        | Rojo                                       | 1                                                      | 0.5%                                        |
| Blanco de tres meses                        | 3                                                      | 1.5%                                        | Ejotero                                    | 4                                                      | 2.0%                                        |
| Gruesso                                     | 1                                                      | 0.5%                                        | Frijol de milpa                            | 1                                                      | 0.5%                                        |
| Mejorados, incluso el elotero               | 12                                                     | 5.9%                                        |                                            |                                                        |                                             |

<sup>1</sup> Local name in Spanish or Valley Zapotec

Table S2. Model information for logits included in Figure 3

bnlogit4 (n=129 bc only those selling MZ)  
a) bean diversity <2 vs >=2  
summ(bnlogit4, scale = TRUE)  
MODEL INFO:  
Observations: 129 (277 missing obs. deleted)  
Dependent Variable: BNDIV1  
Type: Generalized linear model  
Family: binomial  
Link function: logit

MODEL FIT:  
 $\chi^2(3) = 42.16$ ,  $p = 0.00$   
Pseudo-R<sup>2</sup> (Cragg-Uhler) = 0.39  
Pseudo-R<sup>2</sup> (McFadden) = 0.26  
AIC = 128.64, BIC = 140.07

Standard errors: MLE

|             | Est.  | S.E. | z val. | p    |
|-------------|-------|------|--------|------|
| (Intercept) | -0.18 | 0.40 | -0.44  | 0.66 |
| SELLBN      | 1.21  | 0.47 | 2.56   | 0.01 |
| REG         | -2.14 | 0.47 | -4.54  | 0.00 |
| SELLMZ_AMT  | -0.59 | 0.25 | -2.40  | 0.02 |

vif(glm(BNDIV1  
~ SELLBN +  
REG +  
SELLMZ\_AMT,  
data =  
OAX8\_2022,  
family =  
"binomial"))  
SELLBN REG SELLMZ\_AMT  
1.070018 1.068131 1.014269  
Confusion Matrix and Statistics

Reference  
Prediction 0 1

mzlogit2A  
a) maize diversity <2 vs >=2  
summ(mzlogit2A, scale = TRUE)  
MODEL INFO:  
Observations: 391 (15 missing obs. deleted)  
Dependent Variable: MZDIV1  
Type: Generalized linear model  
Family: binomial  
Link function: logit

MODEL FIT:  
 $\chi^2(2) = 43.72$ ,  $p = 0.00$   
Pseudo-R<sup>2</sup> (Cragg-Uhler) = 0.15  
Pseudo-R<sup>2</sup> (McFadden) = 0.09  
AIC = 437.75, BIC = 449.66

Standard errors: MLE

|             | Est.  | S.E. | z val. | p    |
|-------------|-------|------|--------|------|
| (Intercept) | -0.25 | 0.15 | -1.74  | 0.08 |
| REG         | -1.44 | 0.25 | -5.82  | 0.00 |
| KGMZPP_HUM  | 0.34  | 0.13 | 2.68   | 0.01 |

vif(glm(MZDIV1  
~ REG +  
KGMZPP\_HUM,  
data =  
OAX8\_2022,  
family =  
"binomial"))  
REG KGMZPP\_HUM  
1.021342 1.021342  
Confusion Matrix and Statistics

Reference  
Prediction 0 1

0 78 14  
1 9 28

Accuracy : 0.8217  
95% CI : (0.7446, 0.8835)  
No Information Rate : 0.6744  
P-Value [Acc > NIR] : 0.0001337

Kappa : 0.5811

Mcnemar's Test P-Value : 0.4042485

Sensitivity : 0.8966  
Specificity : 0.6667  
Pos Pred Value : 0.8478  
Neg Pred Value : 0.7568  
Prevalence : 0.6744  
Detection Rate : 0.6047  
Detection Prevalence : 0.7132  
Balanced Accuracy : 0.7816

'Positive' Class : 0  
odds

|             | OR         | 2.5 %      | 97.5 %     |
|-------------|------------|------------|------------|
| (Intercept) | 11.6785475 | 2.73831470 | 53.3855186 |
| SELLBN      | 3.3389839  | 1.36330712 | 8.7819082  |
| REG         | 0.1176842  | 0.04473915 | 0.2876116  |
| SELLMZ_AMT  | 0.5358033  | 0.31306026 | 0.8786096  |

0 269 100  
1 6 16

Accuracy : 0.7289  
95% CI : (0.6819, 0.7724)  
No Information Rate : 0.7033  
P-Value [Acc > NIR] : 0.1462

Kappa : 0.1516

Mcnemar's Test P-Value : <2e-16

Sensitivity : 0.9782  
Specificity : 0.1379  
Pos Pred Value : 0.7290  
Neg Pred Value : 0.7273  
Prevalence : 0.7033  
Detection Rate : 0.6880  
Detection Prevalence : 0.9437  
Balanced Accuracy : 0.5581

'Positive' Class : 0  
odds

|             | OR        | 2.5 %     | 97.5 %    |
|-------------|-----------|-----------|-----------|
| (Intercept) | 2.0187984 | 0.9608336 | 4.2509560 |
| REG         | 0.2377706 | 0.1448358 | 0.3818839 |
| KGMZPP_HUM  | 2.4375162 | 1.2932240 | 4.7839525 |

Table S2. Model information for logits included in Figure 3, continued

bnlogit5

b) bean diversity <3 vs >=3

summ(bnlogit5, scale = TRUE)

MODEL INFO:

Observations: 396 (10 missing obs. deleted)

Dependent Variable: BNDIV2

Type: Generalized linear model

Family: binomial

Link function: logit

MODEL FIT:

$\chi^2(3) = 40.95, p = 0.00$

Pseudo-R<sup>2</sup> (Cragg-Uhler) = 0.19

Pseudo-R<sup>2</sup> (McFadden) = 0.15

AIC = 247.46, BIC = 263.39

Standard errors: MLE

|             | Est.  | S.E. | z val. | p    |
|-------------|-------|------|--------|------|
| (Intercept) | -1.96 | 0.23 | -8.41  | 0.00 |
| SELLBN      | 1.18  | 0.36 | 3.29   | 0.00 |
| REG         | -1.59 | 0.41 | -3.89  | 0.00 |
| MZDIV       | 0.45  | 0.14 | 3.19   | 0.00 |

vif(glm(BNDIV2 ~  
SELLBN + REG +  
MZDIV, data =  
OAX8\_2022, family  
= "binomial"))

SELLBN REG MZDIV  
1.040436 1.043391 1.004794

Confusion Matrix and Statistics

| Reference    |     |    |
|--------------|-----|----|
| Prediction 0 | 1   |    |
| 0            | 351 | 41 |

mzlogit3A

b) maize diversity <3 vs >=3

summ(mzlogit3A, scale = TRUE)

MODEL INFO:

Observations: 405 (1 missing obs. deleted)

Dependent Variable: MZDIV2

Type: Generalized linear model

Family: binomial

Link function: logit

MODEL FIT:

$\chi^2(1) = 6.49, p = 0.01$

Pseudo-R<sup>2</sup> (Cragg-Uhler) = 0.04

Pseudo-R<sup>2</sup> (McFadden) = 0.03

AIC = 185.18, BIC = 193.19

Standard errors: MLE

|             | Est.  | S.E. | z val. | p    |
|-------------|-------|------|--------|------|
| (Intercept) | -2.84 | 0.23 | -12.48 | 0.00 |
| BNDIV       | 0.50  | 0.20 | 2.56   | 0.01 |

[no VIF as only 1 I.Var.]

Confusion Matrix and Statistics

| Reference    |     |    |
|--------------|-----|----|
| Prediction 0 | 1   |    |
| 0            | 380 | 25 |

1 0 4

Accuracy : 0.8965  
95% CI : (0.8622, 0.9247)  
No Information Rate : 0.8864  
P-Value [Acc > NIR] : 0.2946

Kappa : 0.1474

Mcnemar's Test P-Value : 4.185e-10

Sensitivity : 1.00000  
Specificity : 0.08889  
Pos Pred Value : 0.89541  
Neg Pred Value : 1.00000  
Prevalence : 0.88636  
Detection Rate : 0.88636  
Detection Prevalence : 0.98990  
Balanced Accuracy : 0.54444

'Positive' Class : 0

odds

OR 2.5 % 97.5 %  
(Intercept) 0.2705114 0.07545542  
0.9742509  
SELLBN 3.2477394 1.60048182 6.5722374  
REG 0.2044316 0.08690264  
0.4365559  
MZDIV 1.9758734 1.29409423  
3.0035808

1 0 0

Accuracy : 0.9383  
95% CI : (0.9102, 0.9597)  
No Information Rate : 0.9383  
P-Value [Acc > NIR] : 0.5529

Kappa : 0

Mcnemar's Test P-Value : 1.587e-06

Sensitivity : 1.0000  
Specificity : 0.0000  
Pos Pred Value : 0.9383  
Neg Pred Value : NaN  
Prevalence : 0.9383  
Detection Rate : 0.9383  
Detection Prevalence : 1.0000  
Balanced Accuracy : 0.5000

'Positive' Class : 0

> odds <-exp(cbind(OR = coef(mzlogit3A), confint(mzlogit3A)))

Waiting for profiling to be done...

> odds

OR 2.5 % 97.5 %  
(Intercept) 0.03138054 0.01358346 0.06422367  
BNDIV 1.68858458 1.13012290 2.53162582

**Table S3. Environments and fields of maize and bean sown, as reported by farming households, 2007**

| Region, community                        | Maize farming, household <sup>-1</sup>                                          |       |                                                |       | Bean farming, household <sup>-1</sup>                                            |       |
|------------------------------------------|---------------------------------------------------------------------------------|-------|------------------------------------------------|-------|----------------------------------------------------------------------------------|-------|
|                                          | Number of environments planted, maximum = 3: fría, templada, caliente           |       | Total number of fields across all environments |       | Number of environments planted, maximum = 3 = fría, templada, caliente           |       |
|                                          | Mean                                                                            | SD    | Mean                                           | SD    | Mean                                                                             | SD    |
| <b>Sierra Juárez, all communities</b>    | 1.23                                                                            | 0.464 | 1.67                                           | 1.076 | 1.15                                                                             | 0.591 |
| San Juan Atepec                          | 1.27                                                                            | 0.451 | 1.65                                           | 0.770 | 1.31                                                                             | 0.616 |
| Santa María Jaltianguis                  | 1.42                                                                            | 0.642 | 2.46                                           | 1.487 | 1.32                                                                             | 0.683 |
| Asunción Cacalotepec                     | 1.15                                                                            | 0.357 | 1.29                                           | 0.544 | 1.04                                                                             | 0.544 |
| Totontepec Villa de Morelos              | 1.06                                                                            | 0.238 | 1.27                                           | 0.802 | 0.92                                                                             | 0.392 |
|                                          | Maize farming, household <sup>-1</sup>                                          |       |                                                |       | Bean farming, household <sup>-1</sup>                                            |       |
|                                          | Number of environments planted, maximum = 2: summer/ rainfed, winter/ irrigated |       | Total number of fields across all environments |       | Number of environments planted, maximum = 2 = summer/ rainfed, winter/ irrigated |       |
|                                          | Mean                                                                            | SD    | Mean                                           | SD    | Mean                                                                             | SD    |
| <b>Valles Centrales, all communities</b> | 1.13                                                                            | 0.352 | 2.48                                           | 2.139 | 0.70                                                                             | 0.545 |
| Santa Marta Chichihualtepec              | 1.06                                                                            | 0.242 | 2.41                                           | 1.606 | 0.71                                                                             | 0.500 |
| San Agustín Amatengo                     | 1.10                                                                            | 0.298 | 2.06                                           | 1.468 | 0.73                                                                             | 0.598 |
| San Andrés Zautla                        | 1.08                                                                            | 0.344 | 1.73                                           | 1.056 | 0.82                                                                             | 0.441 |
| Valdeflores Zimatlán                     | 1.27                                                                            | 0.447 | 3.57                                           | 3.156 | 0.57                                                                             | 0.599 |

Source: authors' interviews
